# Supplementary material for: Carbonation Induced Structural Changes in Soil-Based Alkali-Activated Binders
Source: Research Square preprint supplement (doi:10.21203/rs.3.rs-6428163/v1), 2025-04-28
Supplement: Supplementary file 1 [file 35f00f661e4e49bdadde96f3.pdf]

## Supplementary information

### **Carbonation Induced Structural Changes in Soil-Based Alkali-Activated Binders**

Nikita Rao,<sup>1,†</sup> Pitabash Sahoo,<sup>2,†</sup> P.S.V.R.A Kishor,<sup>3</sup> Adarsh Pathiyath,<sup>3</sup> Aslam Kunhi Mohamed,<sup>3</sup> Souradeep Gupta,<sup>2</sup> Amrit Venkatesh,<sup>4</sup> Sheetal K. Jain<sup>1,\*</sup>

<sup>1</sup>Solid State and Structural Chemistry Unit, Indian Institute of Science, Bengaluru, India

<sup>2</sup>Centre for Sustainable Technology, Indian Institute of Science, Bengaluru, India

<sup>3</sup>Department of Civil Engineering, Indian Institute of Technology Madras, Chennai, India

<sup>4</sup>National High Magnetic Field Laboratory, Florida State University, Tallahassee, Florida 32310, United States

†N. Rao and P. Sahoo contributed equally to this work

\*E-mail: skj@iisc.ac.in

#### **This file includes:**

Supplementary Figures S1-S13

Supplementary Tables S1-S7

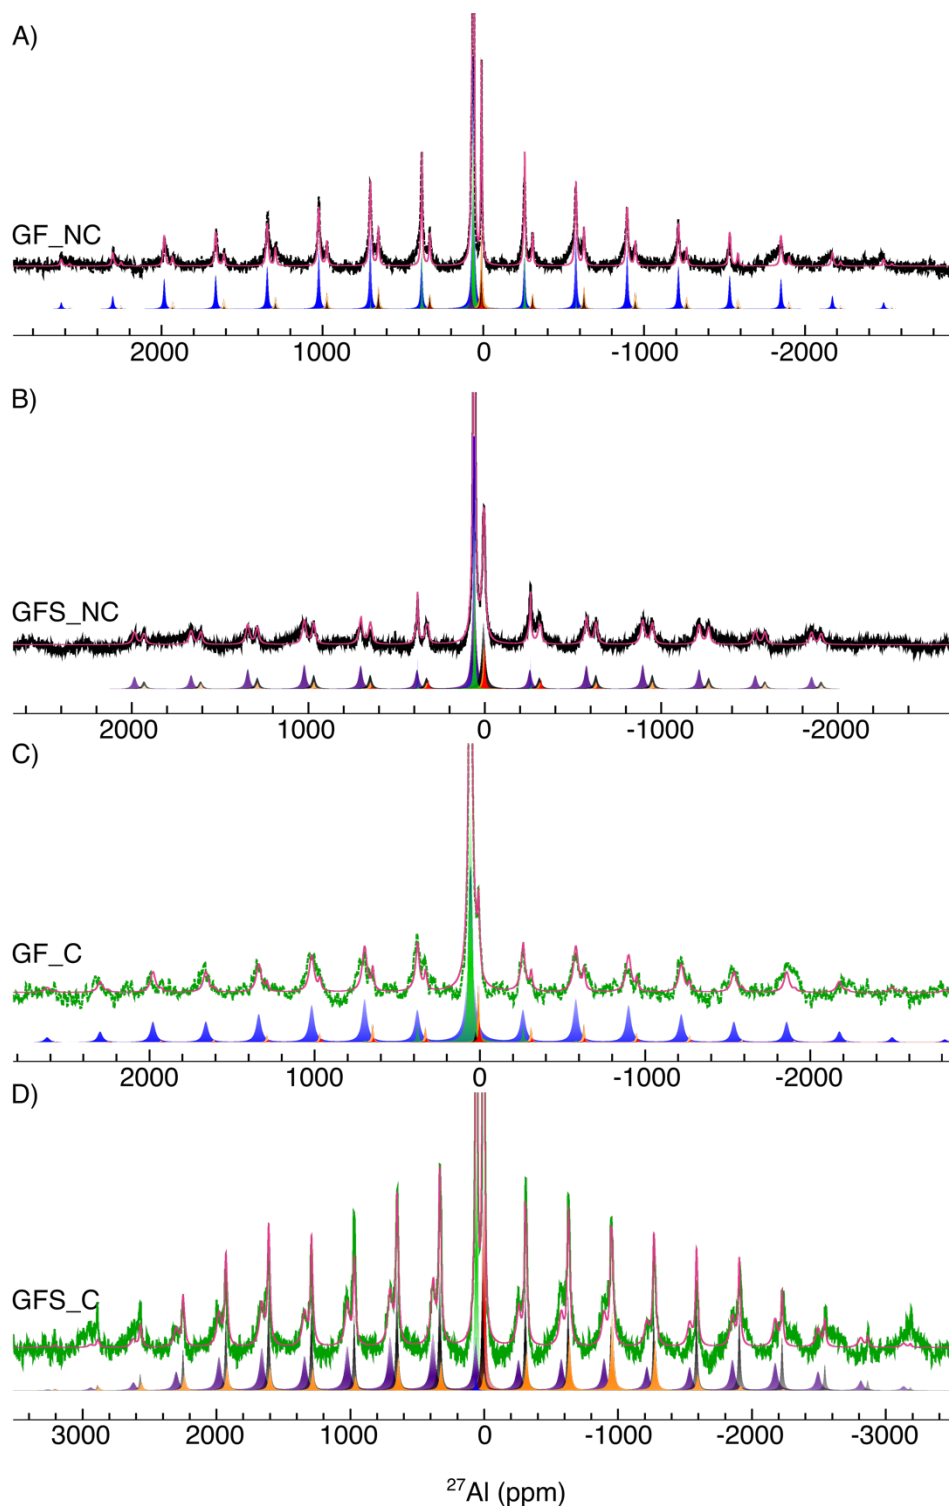

**Fig. S1. Fitted  $^{27}\text{Al}$  MAS NMR spectrum of the GF\_NC sample.**

$^{27}\text{Al}$  MAS NMR spectra (blue line) of the GF\_NC sample, with the fitted spectrum shown in red. The inset highlights the isotropic region, where six components were used for deconvolution: three peaks corresponding to Al(IV) and three to Al(VI) sites. Fit parameters are detailed in Table S1. The full spectrum illustrates the spinning sideband pattern fitted using the quadrupolar (quad) and chemical shift anisotropy (CSA) models. The spectra were acquired at 9.4 T and 33.33 kHz MAS

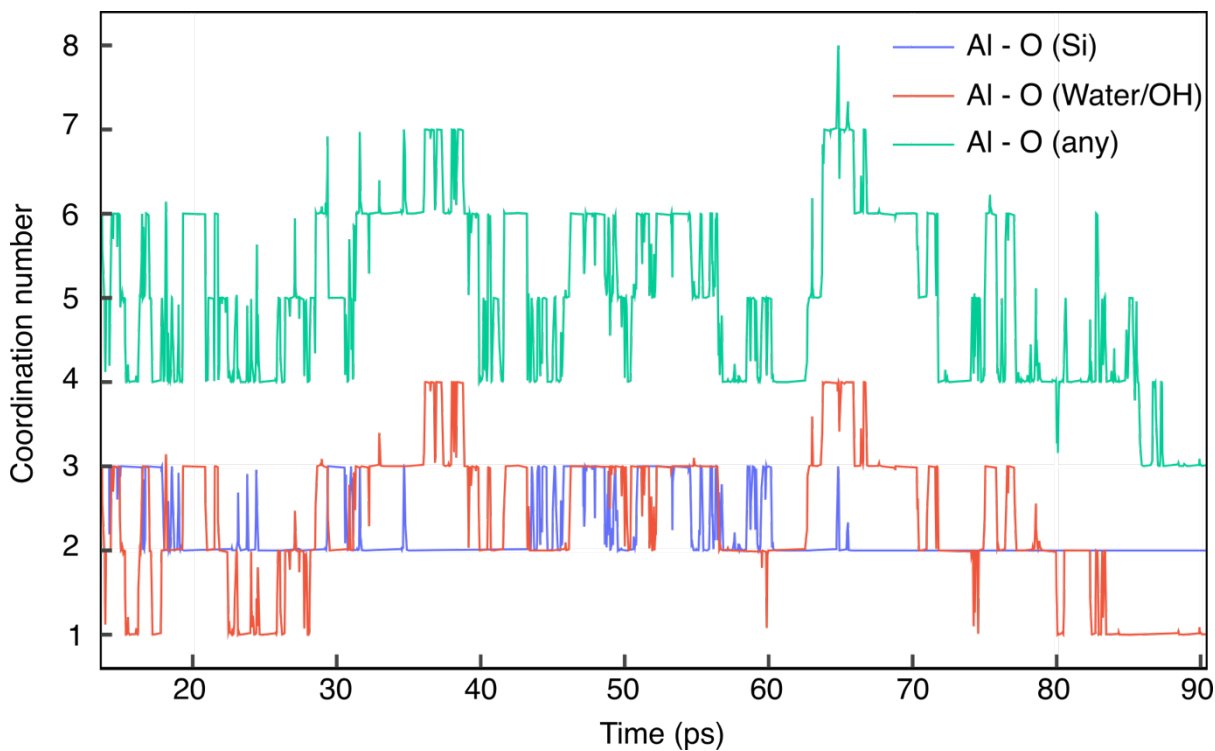

**Fig. S2. Coordination numbers (CN) of aluminum with different species as a function of time.** Here, we can observe that the chosen bias factor is probably too high to explore the different CN for aluminum and this could be optimized (for efficient computing) for a larger set of structures to avoid  $CN < 4$  or  $CN > 6$ . This is beyond the scope of this work.

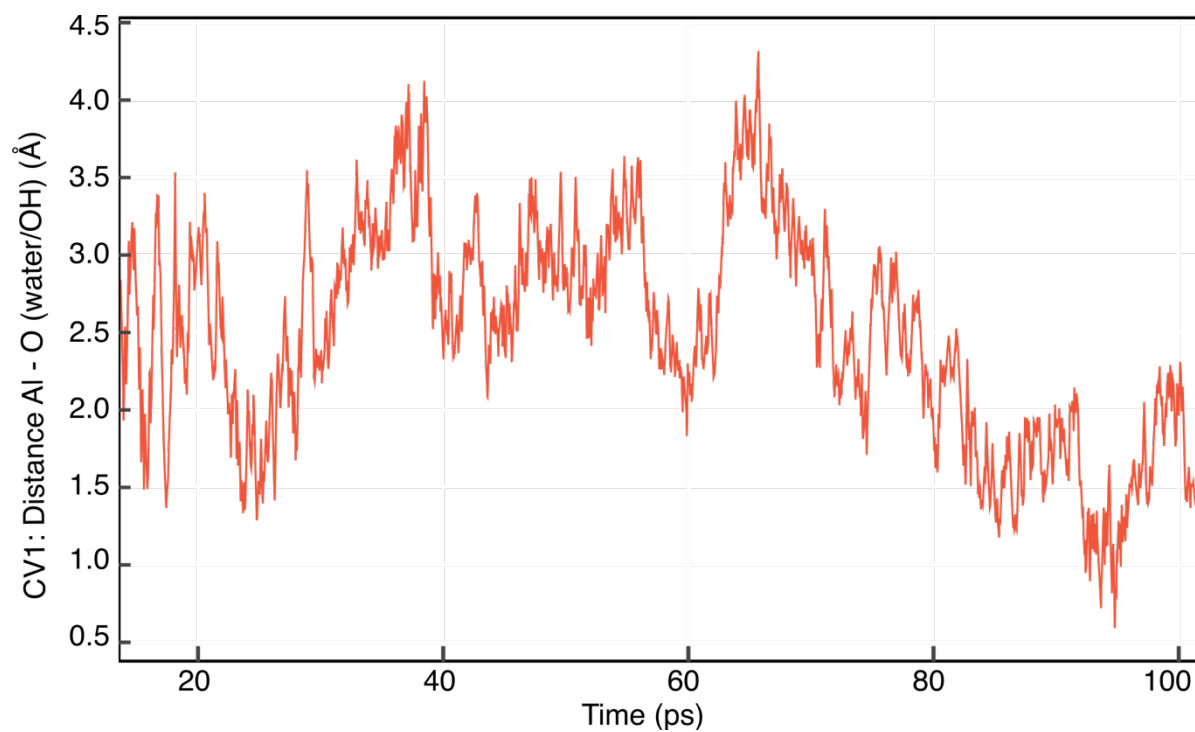

**Fig. S3. Collective variable 1 as a function of time.**

CV1 is the number of oxygen atoms belonging to a water molecule or hydroxyl which are less than 0.23 nm away from the aluminum atom in the C-A-S-H structure considered.

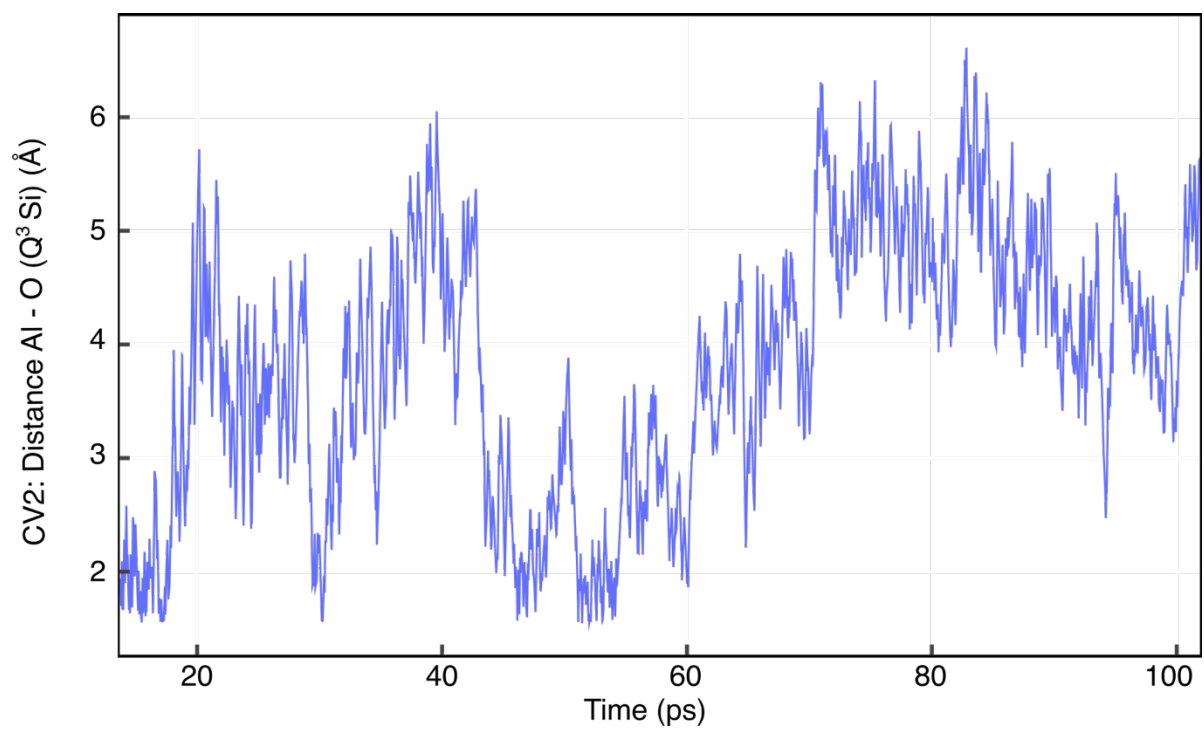

**Fig. S4. Collective variable 2 as a function of time.**

CV2 is the distance between the aluminum atom and the oxygen of the bridging silicon in the other chain, making a cross-linking if it is bonded to the aluminum.

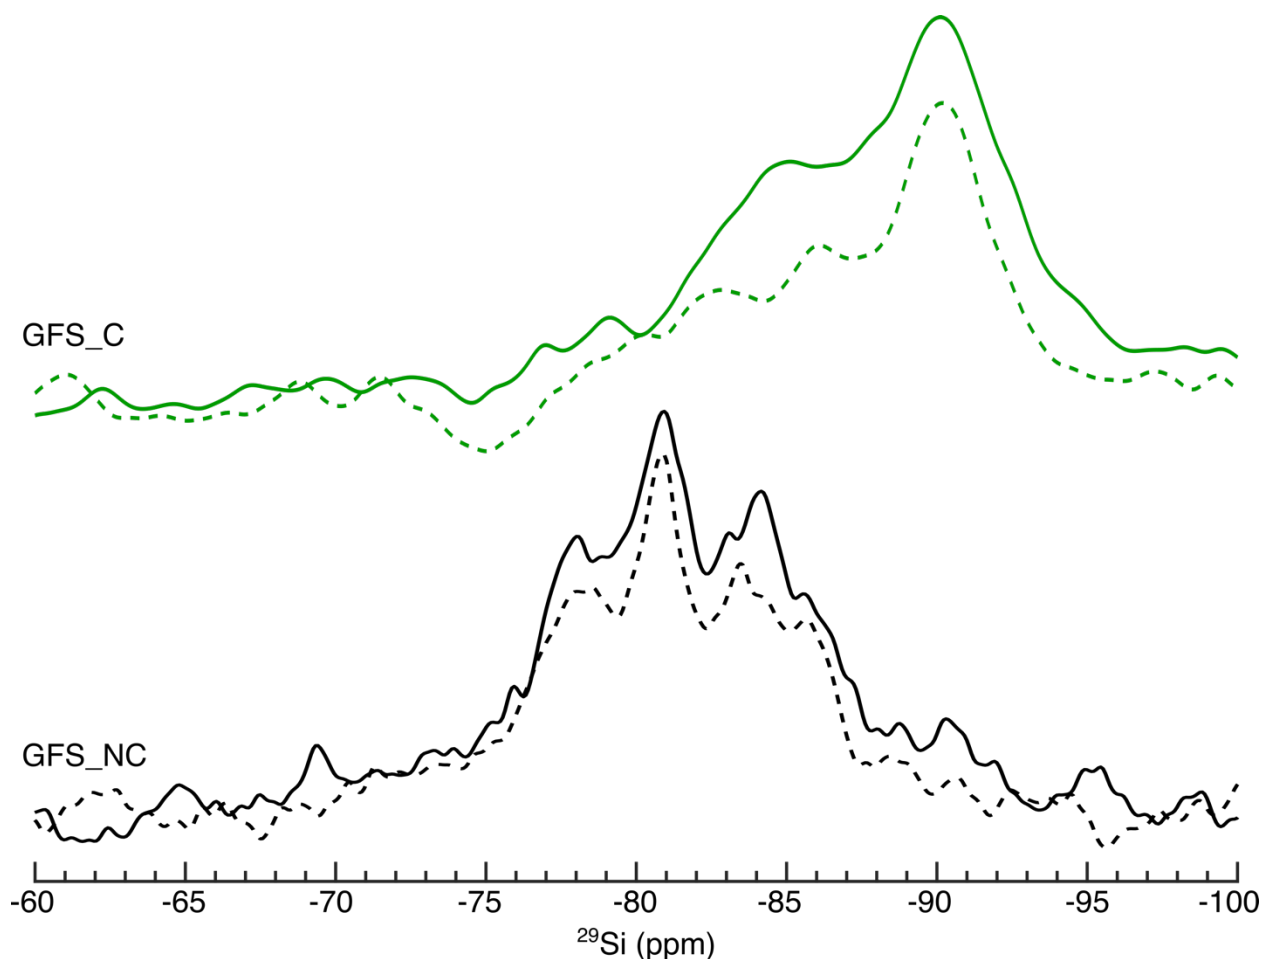

**Fig. S5.  $^{29}\text{Si}\{^{27}\text{Al}\}$  RESPDOR spectra for GFS samples.**

R-RESPDOR (rotation echo saturation pulse double resonance)<sup>1</sup> reference spectrum ( $S_0$ ) are shown using solid lines while the dashed lines represent the dephased spectrum ( $S$ ) are shown in dashed lines and the GFS in solid lines. The spectra were acquired at 18.8 T magnetic field and 16 kHz MAS at the National High Magnetic Field Laboratory (NHMFL). RESPDOR spectra were acquired by direct excitation of  $^{29}\text{Si}$  signals followed by rotary resonance recoupling ( $R^3$ ) at 16 kHz rf power.  $^{29}\text{Si}$   $\pi/2$  and  $\pi$  pulse lengths of 6 and 12  $\mu\text{s}$ , respectively, were used. A  $1.5\times$  rotor period saturation pulse was applied on the  $^{27}\text{Al}$  channel at ca. 40 kHz rf power. The total dipolar recoupling duration was set to 64 rotor cycles. 32,768 scans and a 1 s recycle delay was used.

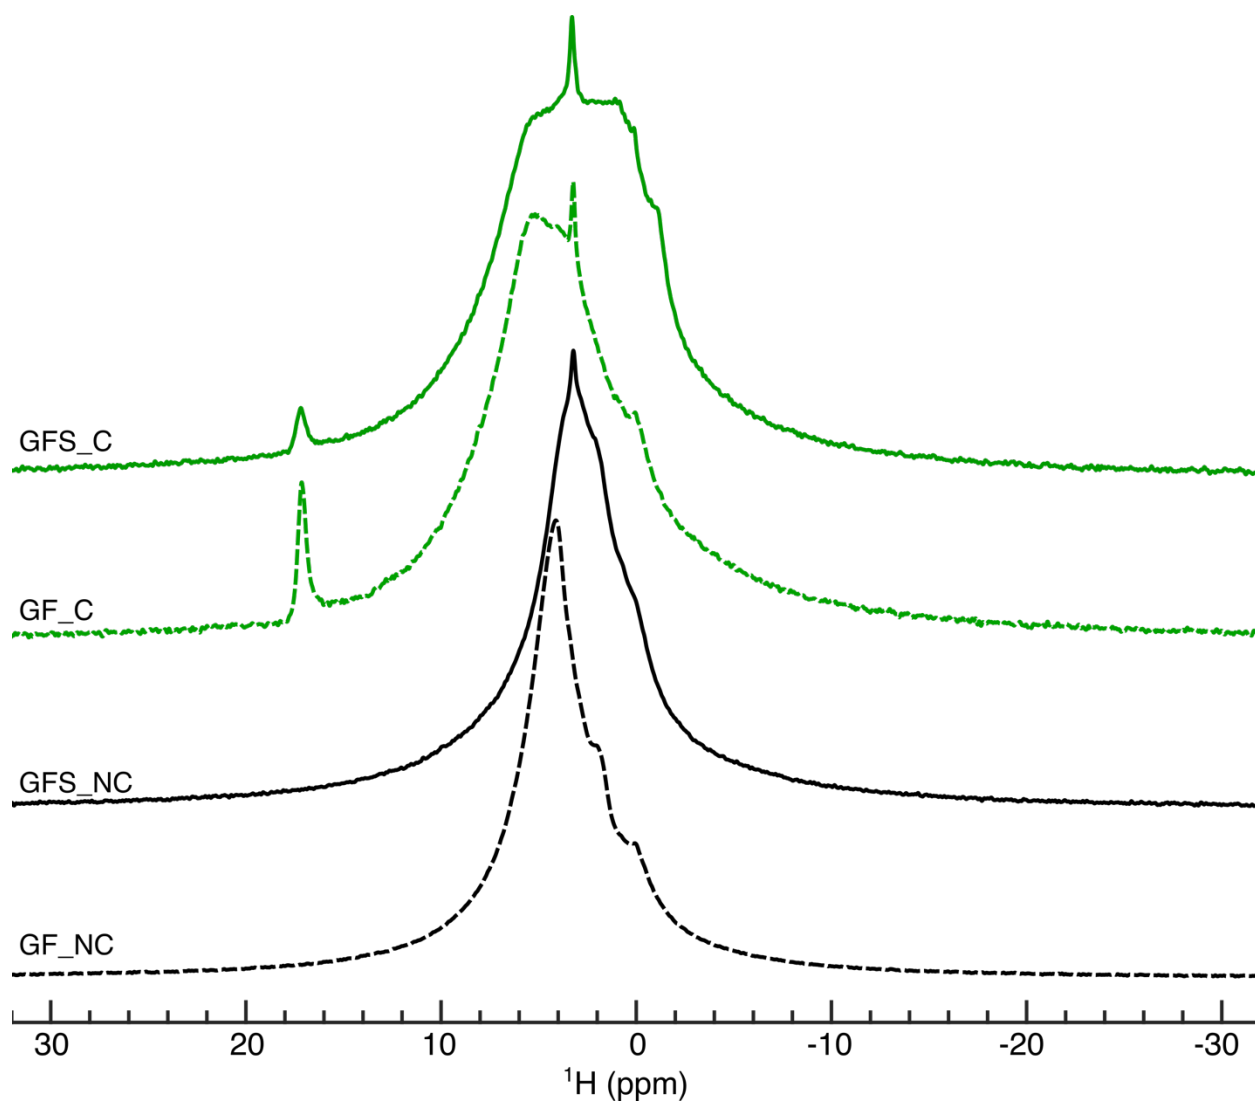

**Fig. S6.  $^1\text{H}$  MAS NMR spectrum at 9.4 T and 35 kHz MAS.**

$^1\text{H}$  MAS NMR spectra for the GF samples are shown in dashed lines and the GFS in solid lines. Black color represents the non-carbonated samples, whereas the spectra for the carbonated samples are shown in green.

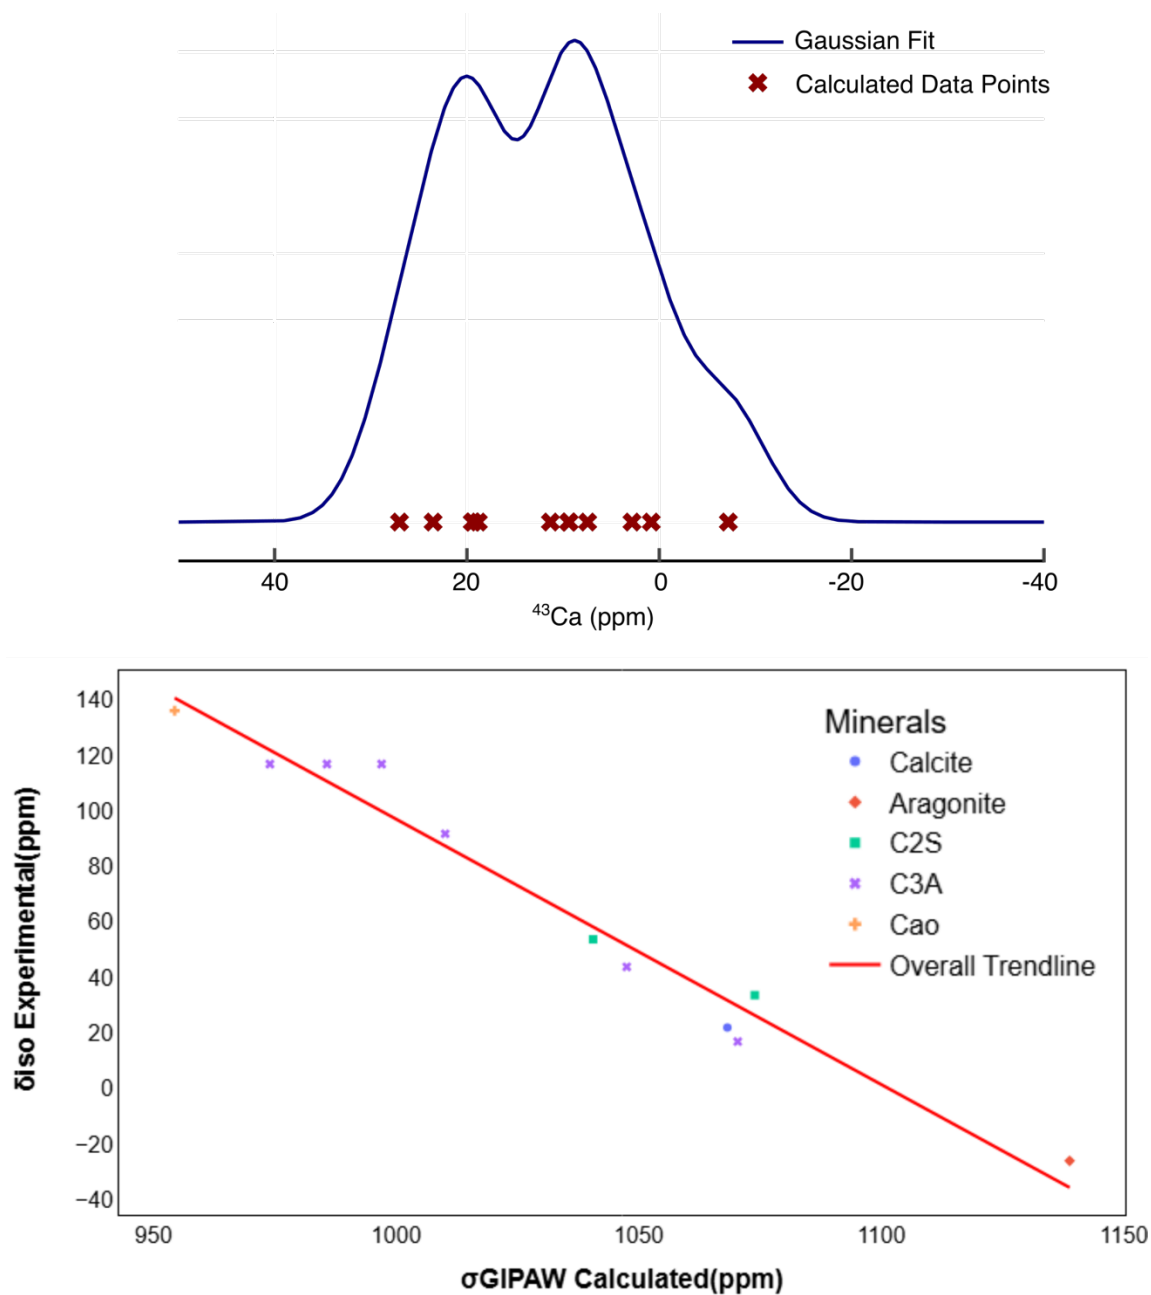

**Fig. S7. Simulated  $^{43}\text{Ca}$  chemical shifts for C-A-S-H (Ca/Si = 0.8)**

$^{43}\text{Ca}$  NMR chemical shift calculated for the C-A-S-H structures with Ca/Si = 0.8 and aluminum in all the three coordination as reported in Figure 4 in the manuscript.



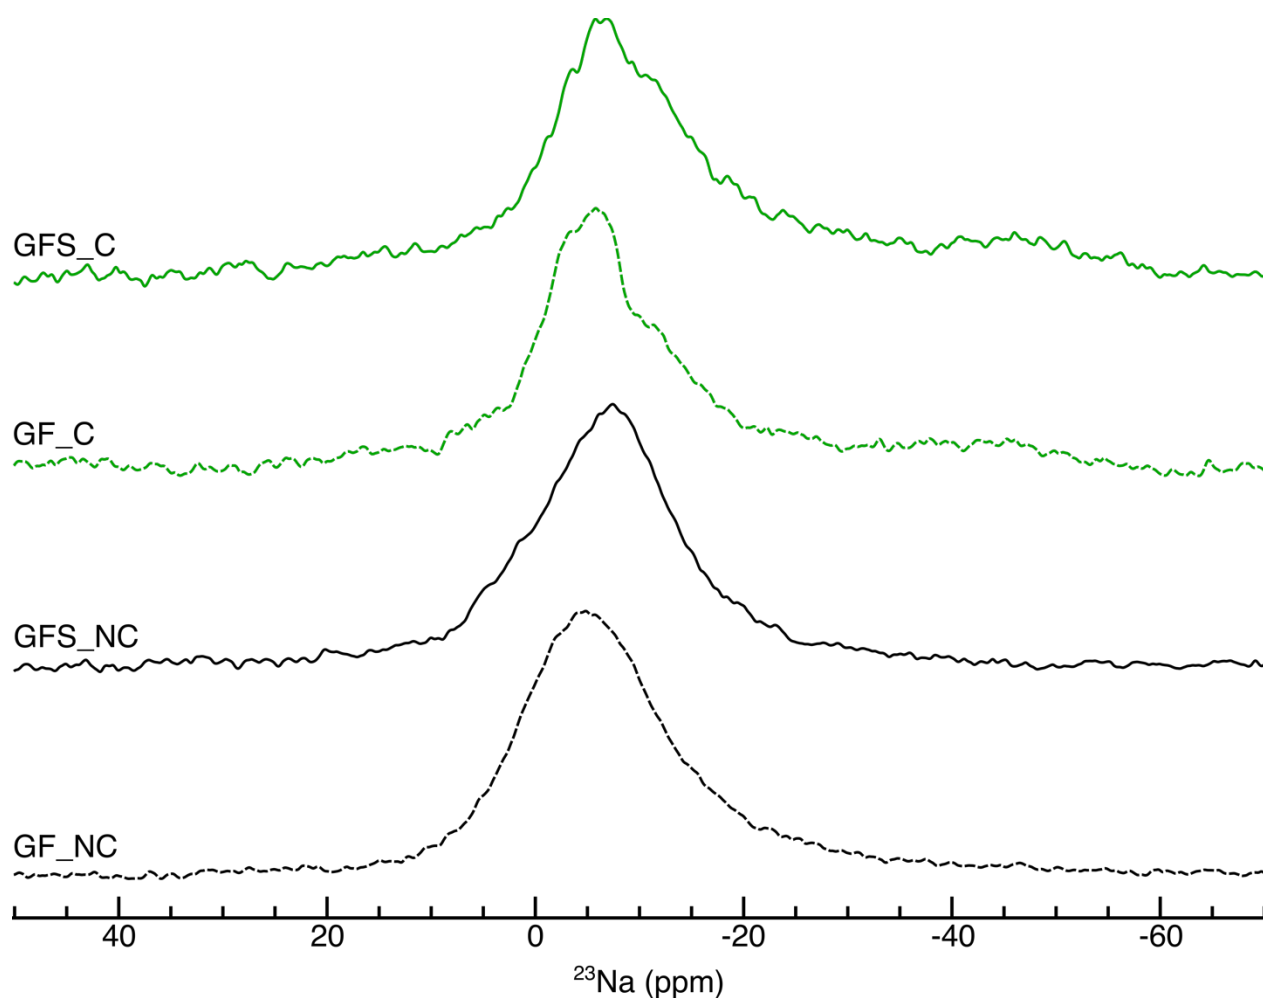

**Fig. S8.  $^{23}\text{Na}$  MAS NMR spectrum at 9.4 T and 30 kHz MAS.**

$^{23}\text{Na}$  MAS NMR spectra for the GF samples are shown in dashed lines and the GFS in solid lines. Black color represents the non-carbonated samples, whereas the spectra for the carbonated samples are shown in green.

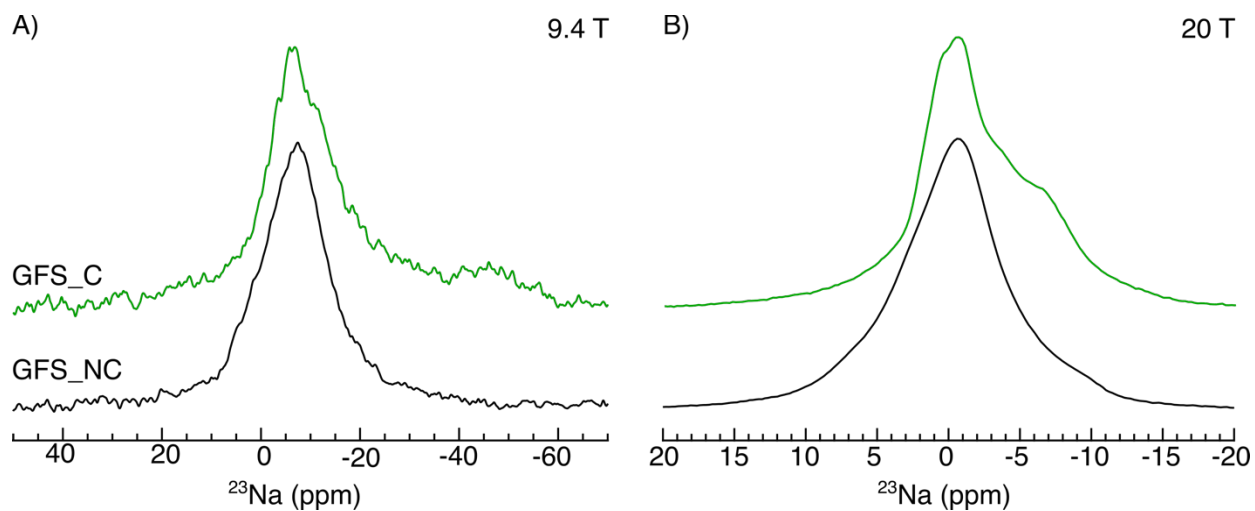

**Fig. S9. Comparison of  $^{23}\text{Na}$  MAS NMR spectra for GFS\_NC and GFS\_C.**

The  $^{23}\text{Na}$  spectra for GFS\_NC (black) and GFS\_C (green) samples recorded at (A) 9.4 T, 30 kHz MAS and (B) 20 T, 16 kHz MAS.

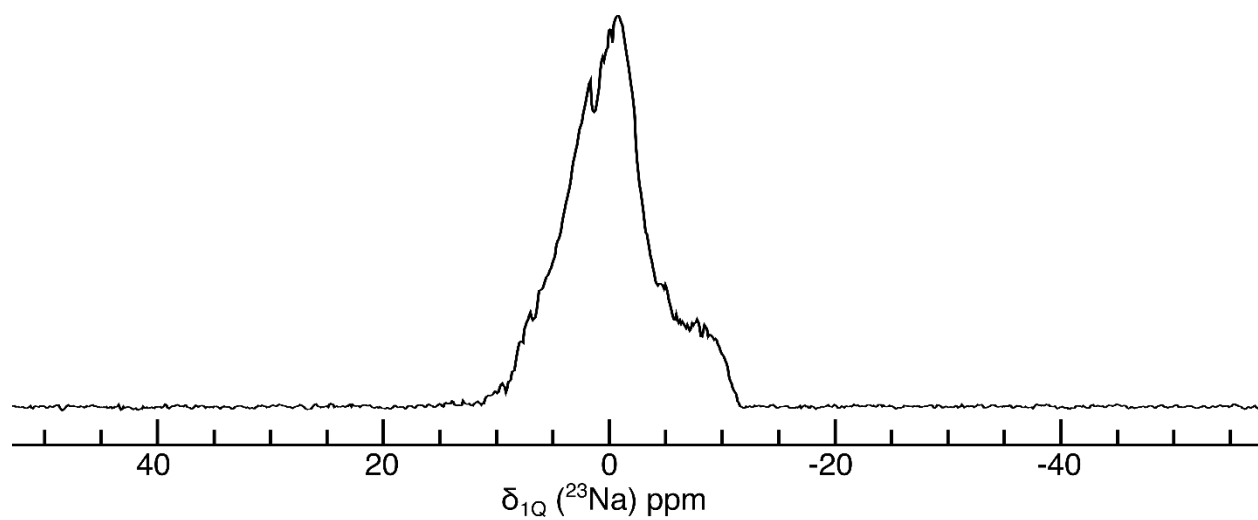

**Fig. S10. 1D projection of  $^{23}\text{Na}$  3QMAS spectrum for GFS\_NC.** The sum projection is taken from 1Q dimension of the  $^{23}\text{Na}$  3QMAS spectrum.

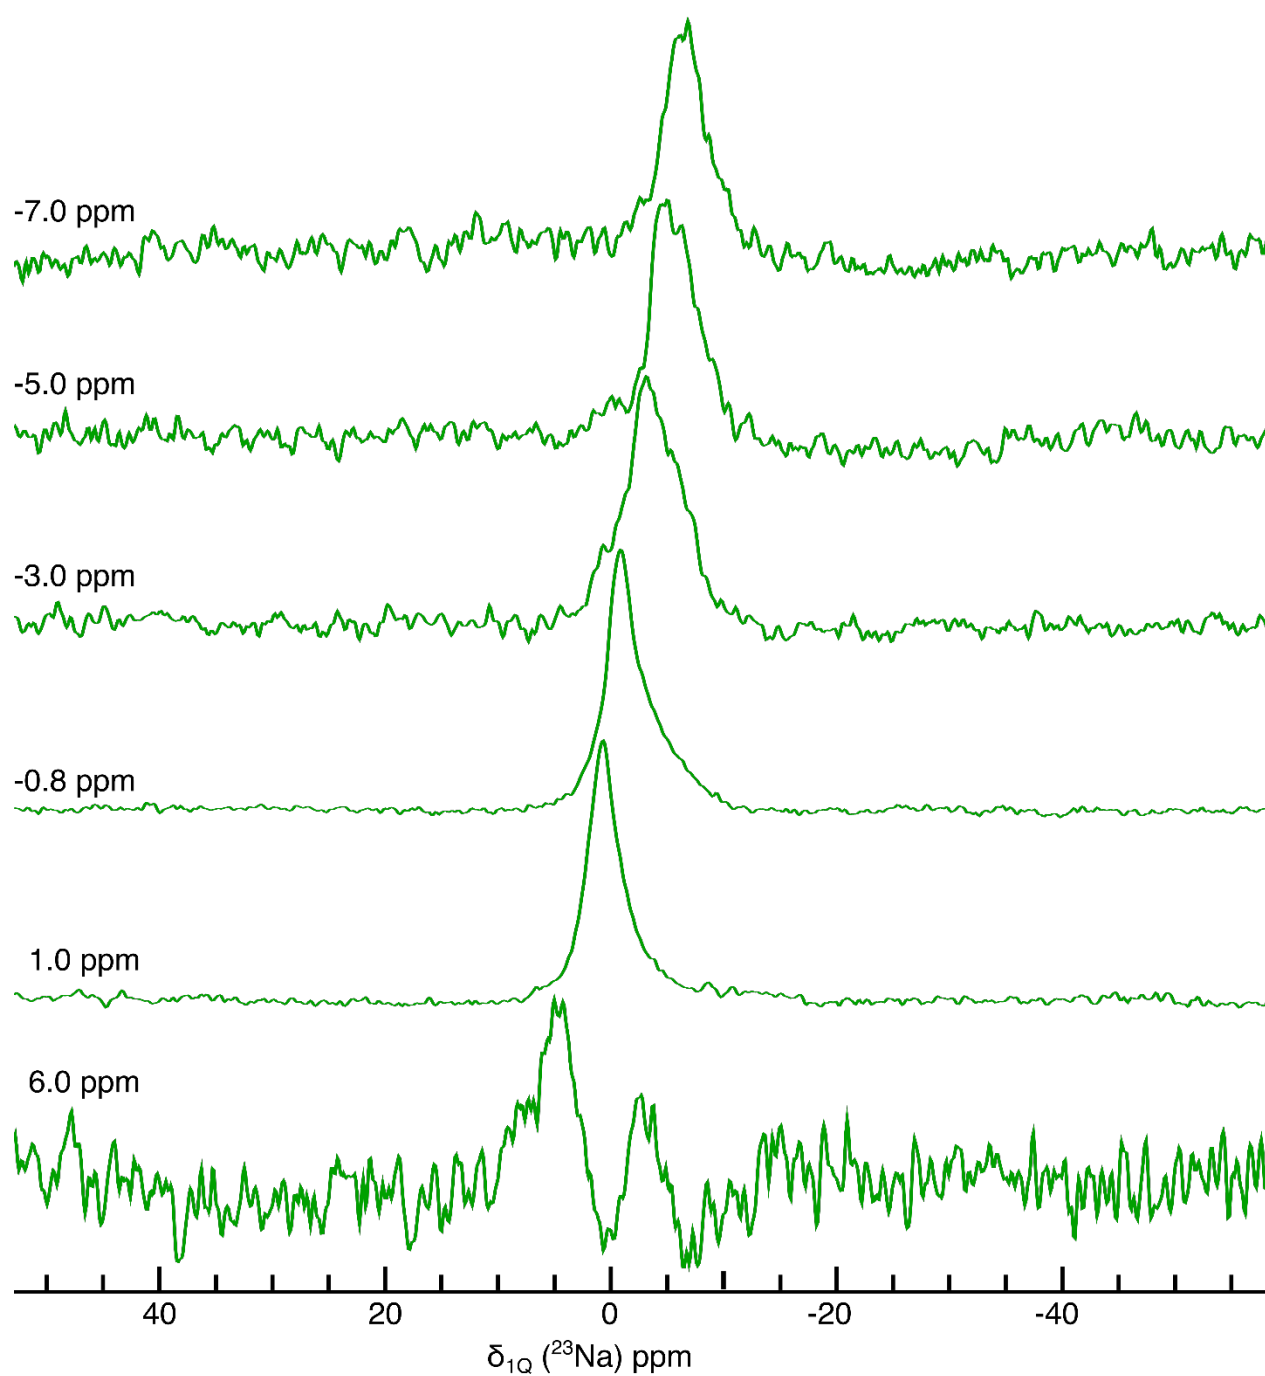

**Fig. S11. Anisotropic slices from  $^{23}\text{Na}$  3QMAS spectrum for GFS\_C.** The slices were taken at different peak positions in the  $^{23}\text{Na}$  3QMAS spectrum.

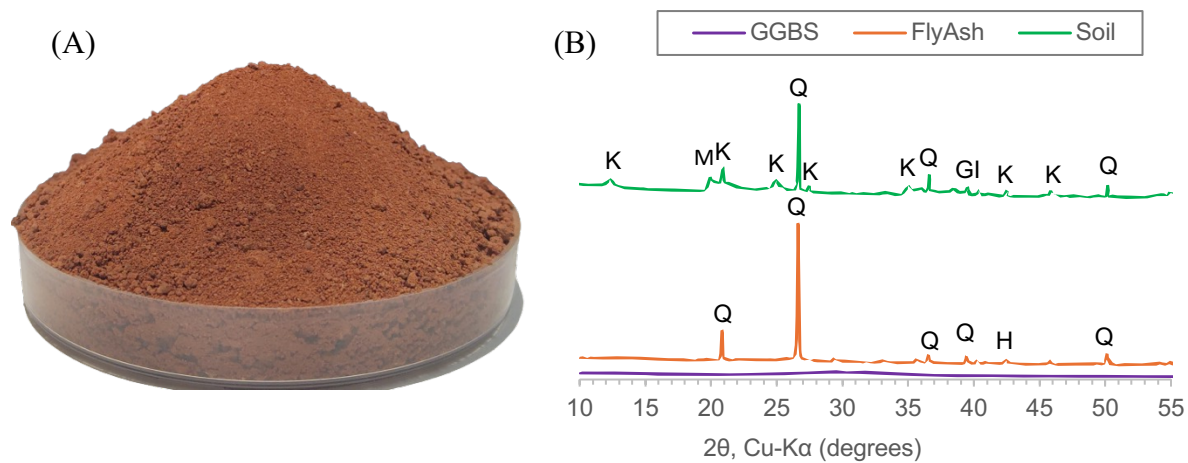

**Fig. S12. XRD spectra for the soil**

(A) laterite soil, (B) XRD of raw materials used in the experiments, K: Kaolinite, M: montmorillonite, GI: gibbsite, Q: Quartz, H: hematite.

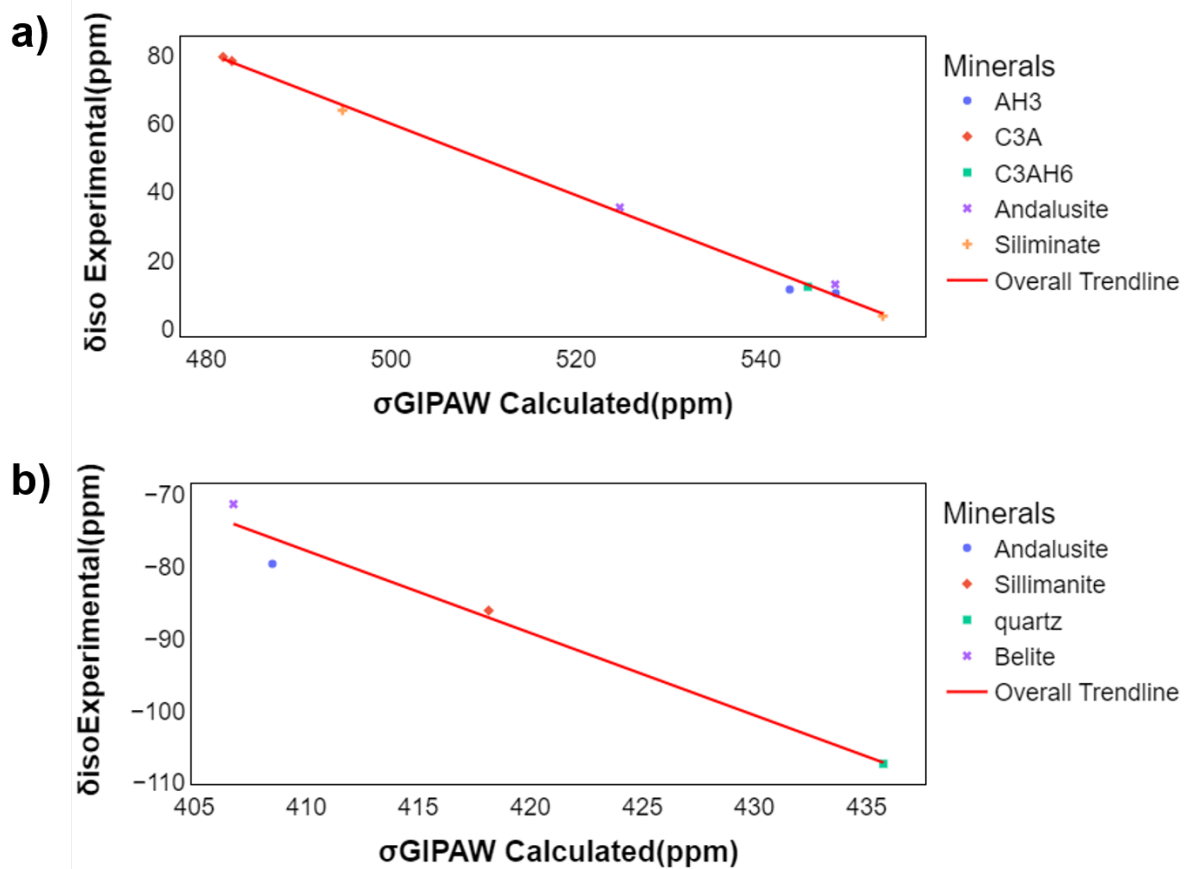

**Fig. S13. Fitting for the  $^{29}\text{Si}$  isotropic chemical shifts and shielding parameter.**

Best fit to a line between the experimental isotropic chemical shifts and calculated isotropic shielding of (A) aluminate and (B) silicate minerals.

| Table S1. Fit parameters of $^{27}\text{Al}$ MAS NMR spectra for GF_NC, GFS_NC, GF_C, and GFS_C |        |                             |    |     |             |      |      |          |       |       |            |     |     |                 |      |      |
|-------------------------------------------------------------------------------------------------|--------|-----------------------------|----|-----|-------------|------|------|----------|-------|-------|------------|-----|-----|-----------------|------|------|
| Site                                                                                            | Sample | $\delta_{\text{iso}}$ (ppm) |    |     | $C_Q$ (kHz) |      |      | $\eta_Q$ |       |       | $LB$ (kHz) |     |     | Relative amount |      |      |
|                                                                                                 |        | I                           | II | III | I           | II   | III  | I        | II    | III   | I          | II  | III | I               | II   | III  |
| Al(IV)                                                                                          | GF_NC  | 60                          | 61 | 74  | 187         | 1481 | 160  | 0.253    | 0.119 | 0.17  | 0.4        | 1.3 | 0.8 | 0.23            | 0.75 | 0.02 |
|                                                                                                 | GFS_NC | 57                          | 60 | 62  | 80          | 108  | 1061 | 0.393    | 0.338 | 1.0   | 0.6        | 0.5 | 2.5 | 0.1             | 0.39 | 0.51 |
|                                                                                                 | GF_C   | 57                          | 58 | –   | 121         | 1578 | –    | 0.032    | 0.051 | –     | 1.4        | 3.8 | –   | 0.28            | 0.72 | –    |
|                                                                                                 | GFS_C  | 57                          | 60 | 62  | 210         | 15   | 341  | 0.888    | 1.0   | 0.201 | 1.3        | 0.7 | 4.3 | 0.26            | 0.01 | 0.73 |
| Al(VI)                                                                                          | GF_NC  | 9                           | 10 | 11  | 233         | 1442 | 961  | 0.015    | 0.006 | 0.084 | 0.3        | 1.3 | 0.8 | 0.07            | 0.6  | 0.32 |
|                                                                                                 | GFS_NC | 0                           | 7  | 8   | 353         | 1844 | 1809 | 0.005    | 0.459 | 0.007 | 1.0        | 1.2 | 2.5 | 0.1             | 0.21 | 0.69 |
|                                                                                                 | GF_C   | 4                           | 10 | –   | 1169        | 1028 | –    | 0.591    | 0.048 | –     | 1.4        | 1.4 | –   | 0.25            | 0.75 | –    |
|                                                                                                 | GFS_C  | 0                           | 1  | 11  | 3           | 113  | 238  | 0.975    | 0.89  | 0.439 | 1.4        | 2.5 | 1.8 | 0.17            | 0.24 | 0.59 |

| <b>Table S2. Calculated and calibrated values of <math>^{27}\text{Al}</math> for different species of C-A-S-H.</b> |                                                                  |                                                                    |
|--------------------------------------------------------------------------------------------------------------------|------------------------------------------------------------------|--------------------------------------------------------------------|
| <b>Type of species</b>                                                                                             | <b>Calculated NMR (<math>\sigma_{\text{GIPAW}}</math>) value</b> | <b>Isotropic chemical shift (<math>\delta_{\text{ref}}</math>)</b> |
| <b>C-A-S-H Al(IV)</b>                                                                                              | 483.33                                                           | 77.35                                                              |
| <b>C-A-S-H Al(V)</b>                                                                                               | 527.29                                                           | 31.45                                                              |
| <b>C-A-S-H Al(VI)</b>                                                                                              | 552.02                                                           | 5.12                                                               |



**Table S3. Calculated and calibrated values of  $^{29}\text{Si}$  for different species of C-A-S-H.**

| Type of species       | Calculated NMR ( $\sigma_{\text{GIPAW}}$ ) value | Isotropic chemical shift ( $\delta_{\text{ref}}$ ) |
|-----------------------|--------------------------------------------------|----------------------------------------------------|
| <b>C-A-S-H Al(IV)</b> | 409.82 ( $\text{Q}^2$ )                          | -77.53                                             |
|                       | 415.71                                           | -84.27                                             |
|                       | 416.15 ( $\text{Q}^2(1\text{Al})$ )              | -84.78                                             |
|                       | 414.16                                           | -82.62                                             |
|                       | 408.8 ( $\text{Q}^3(1\text{Al})$ )               | -76.37                                             |
| <b>C-A-S-H Al(V)</b>  | 414.46 ( $\text{Q}^2$ )                          | -82.84                                             |
|                       | 417.01                                           | -85.76                                             |
|                       | 414.5 ( $\text{Q}^2(1\text{Al})$ )               | -82.88                                             |
|                       | 413.76                                           | -82.04                                             |
|                       | 426.10 ( $\text{Q}^3(1\text{Al})$ )              | -96.16                                             |
| <b>C-A-S-H Al(VI)</b> | 414.91 ( $\text{Q}^2$ )                          | -83.36                                             |
|                       | 417.20                                           | -85.98                                             |
|                       | 417.04 ( $\text{Q}^2(1\text{Al})$ )              | -85.79                                             |
|                       | 414.74                                           | -83.16                                             |
|                       | 411.65 ( $\text{Q}^3(1\text{Al})$ )              | -79.63                                             |

| Table S4. Fit parameters of $^{23}\text{Na}$ MAS NMR spectra for the GFS_NC and GFS_C sample. |                             |          |           |                 |
|-----------------------------------------------------------------------------------------------|-----------------------------|----------|-----------|-----------------|
| Sample                                                                                        | $\delta_{\text{iso}}$ (ppm) | LB (kHz) | xG/(1-x)L | Relative Amount |
| GFS_NC                                                                                        | -8.0                        | 1.2      | 0.3       | 0.06            |
|                                                                                               | -4.0                        | 1.3      | 0.7       | 0.11            |
|                                                                                               | -0.2                        | 1.2      | 0.7       | 0.53            |
|                                                                                               | 4.0                         | 1.9      | 0.5       | 0.30            |
| GFS_C                                                                                         | -7.0                        | 1.1      | 0.0       | 0.23            |
|                                                                                               | -5.0                        | 0.5      | 0.0       | 0.02            |
|                                                                                               | -3.0                        | 0.8      | 0.0       | 0.18            |
|                                                                                               | -0.8                        | 0.5      | 0.8       | 0.12            |
|                                                                                               | 1.0                         | 0.8      | 0.0       | 0.40            |
|                                                                                               | 6.0                         | 1.5      | 0.0       | 0.05            |

| Table S5. Significant bands in the FTIR spectra for GF and GFS sample |                   |                                                                                                                             |
|-----------------------------------------------------------------------|-------------------|-----------------------------------------------------------------------------------------------------------------------------|
| Wavenumber (cm <sup>-1</sup> )                                        | Bands             | Assignment                                                                                                                  |
| 600-400                                                               | Si –O–X (X=Si/Al) | Bending vibrations <sup>2,3</sup>                                                                                           |
| 620-500                                                               | Al–O              | Stretching vibrations in Al(VI) <sup>2</sup>                                                                                |
| 870                                                                   | C–O               | Bending vibrations of O–C–O in CO <sub>3</sub> <sup>2-</sup> . <sup>4</sup>                                                 |
| 970                                                                   | Si–O              | Stretching vibrations of Q <sup>2</sup> tetrahedra <sup>4,5</sup>                                                           |
| 900- 700                                                              | Al–O              | Stretching vibrations in Al(IV) <sup>2</sup>                                                                                |
| 1300-850                                                              | Si –O–X (X=Si/Al) | Asymmetric and symmetric stretching vibration in aluminosilicates <sup>3,6</sup>                                            |
| 1490-1410<br>1490<br>1430-1410                                        | –C–O              | Stretching vibration of CO <sub>3</sub> <sup>2-</sup><br>Vaterite<br>Overlapping bands of vaterite and calcite <sup>7</sup> |
| 1650                                                                  | H–O–H             | Bending vibrations <sup>8</sup>                                                                                             |

**Table S6. Oxide composition (%) of GGBS, FA, and clay and silt fraction of soil (<75 µm)**

| <b>Raw materials</b>           | <b>CaO</b> | <b>SiO<sub>2</sub></b> | <b>Al<sub>2</sub>O<sub>3</sub></b> | <b>Fe<sub>2</sub>O<sub>3</sub></b> | <b>MgO</b> | <b>SO<sub>3</sub></b> | <b>K<sub>2</sub>O</b> | <b>TiO<sub>2</sub></b> | <b>Other elements</b> |
|--------------------------------|------------|------------------------|------------------------------------|------------------------------------|------------|-----------------------|-----------------------|------------------------|-----------------------|
| GGBS                           | 38.6       | 34.8                   | 16.6                               | 0.4                                | 5.4        | 1.6                   | 0.5                   | 0.8                    | < 1.4%                |
| FA                             | 3.2        | 60.6                   | 25.4                               | 5.2                                | 0.9        | -                     | 1.4                   | 1.4                    | < 0.8%                |
| Clay and silt fraction of soil | 0.4        | 53.1                   | 33.9                               | 9.4                                | -          | -                     | 1.3                   | 1.2                    | < 0.5%                |

**Table S7. Mix composition of alkali-activated binders; NC: non-carbonated, C: carbonated**

| <b>Mix composition</b> | <b>GGBS (g)</b> | <b>FA (g)</b> | <b>Soil, &lt;75 <math>\mu\text{m}</math> (g)</b> | <b>8M NaOH (g)</b> | <b>Curing condition</b> |
|------------------------|-----------------|---------------|--------------------------------------------------|--------------------|-------------------------|
| GF                     | 75              | 25            | 0                                                | 74                 | NC, C                   |
| GFS                    | 75              | 25            | 26                                               | 74                 | NC, C                   |

## References

1. Gan, Z. Measuring multiple carbon–nitrogen distances in natural abundant solids using R-RESPDOR NMR. *Chem. Commun.* 4712–4714 (2006) doi:10.1039/b611447d.
2. Fernández-Carrasco, L., Torrens-Martín, D., Morales, L. M. & Martínez-Ramírez, S. Infrared Spectroscopy in the Analysis of Building and Construction Materials. in *Infrared Spectroscopy - Materials Science, Engineering and Technology* 369–382 (Intech, 2012). doi:10.5772/2055.
3. García Lodeiro, I., Macphee, D. E., Palomo, A. & Fernández-Jiménez, A. Effect of alkalis on fresh C–S–H gels. FTIR analysis. *Cem. Concr. Res.* **39**, 147–153 (2009).
4. García-Lodeiro, I., Fernández-Jiménez, A., Blanco, M. T. & Palomo, A. FTIR study of the sol-gel synthesis of cementitious gels: C-S-H and N-A-S-H. *J. Solgel Sci. Technol.* **45**, 63–72 (2008).
5. Ping, Y., Kirkpatrick, R. J., Brent, P., McMillan, P. F. & Cong, X. Structure of Calcium Silicate Hydrate (C-S-H): Near-, Mid-, and Far-Infrared Spectroscopy. *J. Am. Ceram. Soc.* **82**, 742–748 (1999).
6. Panyas, D., Giannopoulou, I. P. & Perraki, T. Effect of synthesis parameters on the mechanical properties of fly ash-based geopolymers. *Colloids Surf. A* **301**, 246–254 (2007).
7. Li, N., Farzadnia, N. & Shi, C. Microstructural changes in alkali-activated slag mortars induced by accelerated carbonation. (2017) doi:10.1016/j.cemconres.2017.07.008.
8. Rovnaník, P. Effect of curing temperature on the development of hard structure of metakaolin-based geopolymer. *Constr. Build. Mater.* **24**, 1176–1183 (2010).
